1 *Classification:* Biological Sciences, Evolution

2

3 **Seed size and its rate of evolution correlate with species diversification across**  
4 **angiosperms**

5

6 **J. Igea<sup>1,4</sup>, E. F. Miller<sup>1,2</sup>, A. S. T. Papadopoulos<sup>3</sup>, A. J. Tanentzap<sup>1</sup>**

7

8 *Author affiliations:*

9 <sup>1</sup> Department of Plant Sciences, University of Cambridge, Downing St, Cambridge,

10 CB2 3EA, UK

11 <sup>2</sup> Department of Zoology, University of Cambridge, Downing St, Cambridge, CB2

12 3EJ, UK

13 <sup>3</sup> Royal Botanic Gardens, Kew, Richmond, TW9 3AB, UK.

14

15 <sup>4</sup>*Corresponding author:*

16 Dr. Javier Igea

17 Department of Plant Sciences, University of Cambridge, Downing St, Cambridge,

18 CB2 3EA, UK

19 [ji247@cam.ac.uk](mailto:ji247@cam.ac.uk)

20

21 *Keywords:*

22 Seed size, diversification, angiosperms, speciation

23

24

25

26 **Abstract**

27

28 Species diversity varies greatly across the different taxonomic groups that comprise  
29 the Tree of Life (ToL). This imbalance is particularly conspicuous within  
30 angiosperms, but is largely unexplained. Seed mass is one trait that may help explain  
31 why some lineages diversify more than others because it integrates across many key  
32 life history traits that influence speciation and extinction, such as dispersal, survival,  
33 environmental tolerance and reproductive success. However, the extent and direction  
34 of the association between seed mass and diversification has not been assessed across  
35 the angiosperm phylogeny. Here, we show for the first time that absolute seed size  
36 and the rate of change in seed size are both associated with variation in diversification  
37 rates. Based on an unequalled phylogenetic tree that included 4105 angiosperm  
38 genera, we found that smaller-seeded plants had higher rates of diversification,  
39 possibly due to improved colonisation potential. The rate of phenotypic change in  
40 seed size was also strongly positively correlated with speciation rates, supporting  
41 emerging evidence that rapid morphological change is associated with species  
42 divergence. Our study now reveals that variation in morphological traits, as well as  
43 the rate at which traits evolve, can contribute to explaining the extremely uneven  
44 distribution of diversity across the ToL.

45

46 **Significance statement**

47 Why species richness varies greatly among different types of organisms is a long-  
48 standing interest of biologists. In flowering plants, seed size may play a role in  
49 generating different levels of species richness because it integrates across many life  
50 history traits that influence speciation and extinction, including environmental

51 tolerance, dispersal ability and survival. Here, we show how seed size and the rate at  
52 which it evolves both correlate with rates of species diversification across flowering  
53 plants. Faster diversification rates were associated with smaller-seeded species and  
54 more rapid changes in seed size, adding to growing evidence linking morphological  
55 and species divergence. These results show how phenotypic traits and their rates of  
56 evolution can help us understand the mechanisms that generate biodiversity.

57

58

59

60 **Text**

61

62 Angiosperms are one of the most species-rich clades on Earth and have dominated  
63 terrestrial plant communities since the Late Cretaceous (1). The astounding diversity  
64 of flowering plants is, however, extremely unevenly distributed across the ToL. Each  
65 of the five most species-rich angiosperm families contains >10,000 species while  
66 more than 200 families contain <100 species each (2). An enduring pursuit in  
67 evolutionary biology is to explain this uneven distribution of biodiversity, not only in  
68 angiosperms, but also across the whole ToL (3).

69

70 Seed mass integrates across many individual life history traits in ways that can  
71 influence angiosperm diversification (4). Along with adult plant size, seed mass  
72 affects survival, reproductive lifespan and dispersal (5). These traits contribute to  
73 fitness and adaptation, which are the ultimate determinants of whether lineages  
74 diversify or go extinct (6). In support of this idea, seed mass has been shown to  
75 correlate negatively with diversification in the Polygoneaceae (7), but this has not

76 been investigated across large taxonomic scales. As seed mass varies over ten orders  
77 of magnitude in angiosperms, from the minute 1  $\mu\text{g}$  seeds of some orchids to the >18  
78 kg seeds of the sea coconut (*Lodoicea maldivica*) this huge variation may coincide  
79 with variation in species diversity. Generalising the direction and magnitude of a link  
80 between seed mass and diversification across taxonomic scales has, however, proved  
81 difficult. Some life history traits encapsulated by seed mass are expected to promote  
82 speciation or extinction, while others may simultaneously counteract such effects.  
83

84 The rate of change in key life history traits, such as seed size, can be as important in  
85 driving macroevolutionary dynamics as the absolute values of the traits themselves  
86 (8). This is because phenotypic divergence may cause reproductive isolation that  
87 results in speciation (9). Nevertheless, few empirical studies have detected a  
88 correlation between rates of phenotypic evolution and lineage diversification (8, 10).  
89 A correlation between the two may be expected where a trait can change more rapidly  
90 in some species than others in response to selective pressures (i.e. high “evolvability”  
91 (11)). This may enable greater access to new ecological niches or quicker  
92 establishment of reproductive isolation, thereby increasing the rate of speciation ( $\lambda$ )  
93 (12). In the case of seed mass, the ability to switch rapidly from small seeds with high  
94 dispersal ability to larger seeds with lower dispersal ability might promote cycles of  
95 rapid colonisation and isolation or permit adaptation to new dispersal vectors in novel  
96 environments. Rapid evolution of new phenotypes may also allow individuals to  
97 escape harsh environmental conditions and competitive interactions (13), thereby  
98 decreasing extinction rates ( $\mu$ ). The net outcome of these processes on diversification  
99 ( $r = \lambda - \mu$ ) will ultimately depend upon which of these rates responds more strongly to  
100 phenotypic change.

101

102 Here we show that both seed mass and its phenotypic rate of evolution correlate with  
103 speciation and extinction across the angiosperm ToL. Our approach combined the  
104 most comprehensive phylogenetic timetree available (14) with an unparalleled dataset  
105 of seed mass measurements (15) to obtain mean seed mass values for 24% of all  
106 described angiosperm genera ( $n = 4105$ ). We estimated rates of speciation and  
107 extinction using Bayesian Analysis of Macroevolutionary Mixtures (BAMM) (16),  
108 which models rate heterogeneity through time and lineages, and accounts for  
109 incomplete taxon sampling. Similarly, we analysed the rates of change in seed size  
110 across the phylogeny. We then estimated the correlations of the macroevolutionary  
111 dynamics with absolute seed size and the rate of seed size evolution.

112

### 113 **Results and discussion**

114 As expected, given the high degree of taxonomic imbalance observed in the  
115 angiosperm phylogeny, we found strong support for multiple shifts in the rates of  
116 diversification. The median number of rate shifts for the speciation/extinction analysis  
117 was 123 (95% confidence interval (CI): 108-143) and 187 (95% CI: 148-226) for the  
118 seed size evolution analysis. Both posterior distributions for the number of rate shifts  
119 were clearly identifiable from their respective priors and were not overly sensitive to  
120 the prior settings (Fig. S1). There was also marked heterogeneity in the rates of seed  
121 size evolution (Fig. 1), which varied over two orders of magnitude (Fig. S2). We then  
122 estimated whether shifts in macroevolutionary dynamics ( $\lambda$ ,  $\mu$  and  $r$ ) were  
123 significantly correlated with absolute mean genus seed size and rates of seed size  
124 evolution by comparing the empirical correlations to a null distribution of correlations  
125 generated using STructured Rate Permutations on Phylogenies (STRAPP), which is

126 robust to phylogenetic pseudoreplication (see Methods for details) (17). We focused  
127 our analysis on genera to maximise the overlap between the phylogenetic and the seed  
128 mass datasets and to make the Bayesian estimation of macroevolutionary dynamics  
129 computationally feasible.

130

131 We were able to link major differences in diversity across angiosperm clades with a  
132 single phenotypic trait that should influence speciation and extinction. Specifically,  
133 increased speciation was associated with smaller seed sizes (Spearman's  $\rho = -0.22$ , p-  
134 value = 0.016; Fig. 2a). Increased extinction rates were similarly associated with  
135 smaller seeds ( $\rho = -0.20$ , p-value = 0.045), but given the relatively weak effect, the net  
136 outcome of  $\lambda - \mu$  was that diversification rates increased with decreasing seed size ( $\rho = -$   
137 0.19, p-value = 0.049). We also identified a stronger positive association between the  
138 rate of seed size evolution and both speciation and extinction ( $\rho = 0.44$ , p-value <  
139 0.0001 and  $\rho = 0.35$ , p-value = 0.003, respectively; Fig. 2b). Again, as the effect of  
140 speciation was greater than that of extinction, rates of diversification and phenotypic  
141 change were positively correlated ( $\rho = 0.42$ , p-value < 0.0001; Fig. 2b). Generally, the  
142 observed correlations arose from many phenotypically fast-evolving clades  
143 distributed across the phylogeny (Fig. S2).

144

145 Our results were unaffected by intra-generic variation in seed mass for two reasons.  
146 First, there was no systematic bias in intra-generic variation across the phylogenetic  
147 tree. We detected no correlation between the mean and the coefficient of variation  
148 (CV) for seed mass of each genus (Fig. S3, PGLS:  $F_{1,131} = 0.67$ , p-value = 0.416).  
149 Second, we could disregard intra-generic variation in rates of seed mass evolution as  
150 influencing our results as we found that genera with larger variation in seed size did

151 not have different macroevolutionary dynamics (Fig. S4, Spearman's  $\rho_\lambda = -0.05$ , p-  
152 value = 0.114;  $\rho_\mu = -0.03$ , p-value = 0.406;  $\rho_r = -0.067$ , p-value = 0.058).

153

154 Our study supports the idea that variation in seed mass and its rate of evolution can  
155 help explain disparity in diversification across the angiosperm phylogeny by playing a  
156 central role in plant life history (Fig. S5). Dispersal ability and environmental  
157 tolerance are two such aspects of life history that covary with seed mass in ways that  
158 can change speciation and extinction. For example, we found that smaller-seeded  
159 genera had faster speciation rates. This may be because smaller-seeded genera  
160 generally disperse over larger distances (18), which can promote speciation by  
161 creating isolated populations (19), especially in fragmented landscapes. Dispersal  
162 syndromes may also modify the effect of seed size on speciation. For instance, species  
163 with larger seeds are generally associated with biotic dispersal that distributes seeds  
164 over greater distances than wind or gravity dispersal (5). However, broad-scale  
165 predictions for the effects of dispersal syndromes on diversification may be  
166 inaccurate, since the former depend on landscape connectivity (20) and can  
167 sometimes be inconsistent, e.g. a wind-dispersed seed might be transported by an  
168 animal. We also found that smaller-seeded genera had higher rates of extinction,  
169 possibly due to smaller nutritional reserves that constrain establishment,  
170 environmental tolerance and access to limiting resources (21). Detailed contextual  
171 data will be necessary to expand upon the mechanisms underlying our findings in  
172 specific regions and clades.

173

174 Although seed mass is associated with other traits that can affect diversification, there  
175 is little evidence that these better explain our observed correlations or that seed size is

176 a mere proxy for one of these other traits. For example, genome size positively  
177 correlates with seed mass (22), and faster rates of genome size evolution have been  
178 linked to increased speciation in angiosperms (23). Shorter, smaller-seeded plants also  
179 tend to have faster life cycles, which may accelerate mutation rates (24) and promote  
180 diversification (25). By comparing the effects of genome size and life cycle across a  
181 subset of >900 genera in our dataset, we found that only the distinction between  
182 strictly annual versus perennial genera influenced macroevolutionary dynamics in a  
183 similar way as seed size (Supplementary Information, Fig. S6). But unlike other traits  
184 (23), both absolute seed size as well as its rate of change were correlated with  
185 speciation and extinction. Thus, although other traits surely influence diversification  
186 (26), we argue that our results generally reflect the role of seed size as a trait that  
187 integrates across multiple aspects of life history traits in ways that can predictably  
188 influence plant macroevolutionary dynamics (Fig. S5).

189

190 Our finding that high rates of phenotypic change correlate with diversification (Fig.  
191 2b) has recently been observed in other taxonomic groups (8, 10), but never across the  
192 whole of the angiosperm ToL. Accelerated morphological evolution may allow  
193 radiating lineages to occupy more complex adaptive landscapes (27). Similarly,  
194 species with greater rate of change in their seed mass (i.e., higher evolvability) could  
195 shift between adaptive peaks or develop reproductive barriers more rapidly.  
196 Alternatively, the theory of punctuated equilibria (28), whereby morphological  
197 changes can arise from the speciation process, might also explain the connection of  
198 phenotypic evolution with species divergence. However, current methods do not  
199 allow us to distinguish whether speciation is responding to morphological change or  
200 vice versa when reconstructing 250 million years of evolutionary history (8).



201

202 The approach applied here can help to unravel the processes responsible for  
203 generating large-scale asymmetries in biodiversity. It also offers the potential to test  
204 how widely-varying traits influence other aspects of the evolution and adaptation of  
205 flowering plants (e.g. (14)). Clade-specific exceptions arising from local interactions  
206 with non-focal traits (29) and specific spatio-temporal contexts will undoubtedly  
207 interact with broad-scale macroevolutionary patterns and may modulate the effects of  
208 seed mass on diversification. Regardless, our results clearly show that seed size and  
209 its rate of evolution correlate with speciation and extinction across the flowering  
210 plants, which may help to explain why some clades are much more species-rich than  
211 others.

212

## 213 **Methods**

214

### 215 *Seed mass and phylogenetic dataset*

216 Seed mass data for 31,932 species were obtained from the Royal Botanic Gardens  
217 Kew Seed Information Database (15). Species names were standardised with The  
218 Plant List (TPL) nomenclature (2) and cleaned using the *Taxonstand* R package (30).  
219 Further processing at the genus-level was carried out with the *taxonlookup* R package  
220 (31), which is a complete genus-family-order mapping for vascular plants that draws  
221 from TPL, the Angiosperm Phylogeny website (32) and a higher-level manually  
222 curated taxonomic lookup (14). Seed mass mean values for each genus were  
223 calculated for a total of 4763 genera.

224

225 We used the most comprehensive phylogenetic tree for land plants (14, 33) that

226 comprises 31,389 species. Taxonomic information for our phylogenetic tree was run  
227 through *Taxonstand* and *taxonlookup* as described above to make it as comparable as  
228 possible to the seed mass dataset. Monophyly of the genera in the tree was assessed  
229 using the *Monophy* package (34). The initial estimate was 16%, but we removed taxa  
230 classified as outliers by *Monophy* (i.e., taxa that lay outside of an established “core  
231 clade” for each genus) and this resulted in only 8% of the genera not being  
232 monophyletic. The *Phyndr* (31) package was then used to generate a genus-level tree  
233 with as much overlap as possible between the phylogeny and the trait data. The final  
234 phylogenetic tree included representatives from 303 plant families (Fig. S7).

235

#### 236 *Diversification and phenotypic evolution analysis*

237 Speciation, extinction and net diversification rates and rates of seed size evolution  
238 were estimated separately on the phylogeny using BAMM version 2.5.0 (16). BAMM  
239 models shifts in macroevolutionary regimes across a phylogenetic tree using  
240 reversible-jump Markov chain Monte Carlo (rjMCMC) sampling. Initial prior settings  
241 were calculated with the *setBAMMpriors* function in *BAMMtools* (35), and the  
242 *expectedNumberOfShifts* parameter was set at 25 for both the speciation/extinction  
243 and trait evolution analyses, respectively. We incorporated non-random incomplete  
244 sampling information following BAMM protocols by calculating the proportion of  
245 genera sampled inside each family and estimated the backbone sampling as the  
246 overall proportion of sampled genera. *Taxonlookup* was used as a reference for these  
247 calculations.

248

249 All analyses were run for 50 million generations. We verified convergence by plotting  
250 chain traces and ensuring that the effective sample sizes of all relevant parameters

251 exceeded 200. The first 10 million generations were discarded as burn-in. The  
252 *plotPrior* function in BAMMtools was used to check the difference between model  
253 priors and posteriors. We also analysed BAMM prior sensitivity by re-running both  
254 the diversification and the trait evolution analyses with different settings for the  
255 *expectedNumberOfShifts* parameter of either 10, 25, 50 or 100 (Fig. S1).

256

### 257 *Correlation of diversification and trait evolution*

258 We used STRAPP to test for multiple associations between macroevolutionary  
259 dynamics and each of seed mass (using genus mean values as character states) and  
260 seed mass rate of evolution (using seed mass evolutionary rates at the tips of the  
261 phylogeny as character states). STRAPP compares the correlation between a focal  
262 trait and a macroevolutionary parameter ( $\lambda$ ,  $\mu$  or  $r$ ) to a null distribution of  
263 correlations. The null correlations are generated by permuting the evolutionary rates  
264 in the tips of the phylogenetic tree while maintaining the location of rate shift events  
265 in the phylogeny. In each case, we calculated the absolute difference between the  
266 observed correlation of the macroevolutionary rate and the trait state and the null  
267 correlation obtained by the structured permutations across 5000 samples from the  
268 BAMM posterior. The reported p-value was the proportion of replicates where the  
269 null correlation coefficient was greater than the observed correlation. We found a low  
270 type I error associated with our STRAPP correlation analysis (p-value = 0.11, Fig.  
271 S8).

272

### 273 *Code availability*

274 Scripts used to carry out the analysis described in the paper and generate the figures  
275 will be deposited in Github.

276

277 **References**

- 278 1. Crane PR, Friis EM, Pedersen KR (1995) The origin and early diversification  
279 of angiosperms. *Nature* 374(6517):27–33.
- 280 2. The Plant List. Version 1.1 (2013) Available at: <http://www.theplantlist.org/>  
281 [Accessed June 20, 2003].
- 282 3. Davies T, Barraclough T (2007) The diversification of flowering plants through  
283 time and space: Key innovations, climate and chance. *Reconstructing the Tree*  
284 *of Life: Taxonomy and Systematics of Species Rich Taxa*, pp 149–163.
- 285 4. Moles AT, et al. (2005) A brief history of seed size. *Science* (80- )  
286 307(January):576–580.
- 287 5. Moles A, Leishman M (2008) The seedling as part of a plant’s life history  
288 strategy. *Seedling Ecology and Evolution*, eds Leck MA, Parker VT, Simpson  
289 RL (Cambridge University Press, Cambridge), pp 215–235.
- 290 6. Salguero-Gómez R, et al. (2016) Fast-slow continuum and reproductive  
291 strategies structure plant life-history variation worldwide. *Proc Natl Acad Sci U*  
292 *S A* 113(1):230–5.
- 293 7. Kostikova A, Salamin N, Pearman PB (2014) The role of climatic tolerances  
294 and seed traits in reduced extinction rates of temperate polygonaceae.  
295 *Evolution (N Y)* 68(7):1856–1870.
- 296 8. Rabosky DL, et al. (2013) Rates of speciation and morphological evolution are  
297 correlated across the largest vertebrate radiation. *Nat Commun* 4:1958.
- 298 9. Coyne JA, Orr HA (2004) *Speciation* (Sinauer Associates).
- 299 10. Price SL, Etienne RS, Powell S (2016) Tightly congruent bursts of lineage and  
300 phenotypic diversification identified in a continental ant radiation. *Evolution*.  
301 doi:10.1111/evo.12894.
- 302 11. Pigliucci M (2008) Is evolvability evolvable? *Nat Rev Genet* 9(1):75–82.
- 303 12. Ricklefs RE, Renner SS (1994) Species richness within families of flowering  
304 plants. *Evolution (N Y)* 48(5):1619–1636.
- 305 13. Rees M, Westoby M (1997) Game-theoretical evolution of seed mass in multi-  
306 species ecological models. *Oikos* 78(1):116–126.
- 307 14. Zanne AE, et al. (2014) Three keys to the radiation of angiosperms into  
308 freezing environments. *Nature* 506(7486):89–92.
- 309 15. Kew Seed Information Database (2016) *R Bot Gard Kew*. Available at:  
310 <http://data.kew.org/sid/> [Accessed March 1, 2016].
- 311 16. Rabosky DL (2014) Automatic detection of key innovations, rate shifts, and  
312 diversity-dependence on phylogenetic trees. *PLoS One* 9(2):e89543.
- 313 17. Rabosky DL, Huang H (2016) A robust semi-parametric test for detecting trait-  
314 dependent diversification. *Syst Biol* 65(2):181–93.
- 315 18. Coomes DA, Grubb PJ (2003) Colonization, tolerance, competition and seed-  
316 size variation within functional groups. *Trends Ecol Evol* 18(6):283–291.
- 317 19. Kisel Y, Barraclough TG (2010) Speciation has a spatial scale that depends on  
318 levels of gene flow. *Am Nat* 175(3):316–34.
- 319 20. Givnish TJ (2010) Ecology of plant speciation. *Taxon* 59(5):1326–1366.
- 320 21. Leishman MR, Wright IJ, Moles AT, Westoby M (2000) The evolutionary  
321 ecology of seed size. *The Ecology of Regeneration in Plant Communities*, pp  
322 31–58.
- 323 22. Beaulieu JM, et al. (2007) Correlated evolution of genome size and seed mass.

- 324 *New Phytol* 173(2):422–37.
- 325 23. Puttick MN, Clark J, Donoghue PCJ (2015) Size is not everything: rates of  
326 genome size evolution, not C-value, correlate with speciation in angiosperms.  
327 *Proc Biol Sci* 282(1820):20152289–.
- 328 24. Lanfear R, Ho SYW, Love D, Bromham L (2010) Mutation rate is linked to  
329 diversification in birds. *Proc Natl Acad Sci U S A* 107(47):20423–8.
- 330 25. Lanfear R, et al. (2013) Taller plants have lower rates of molecular evolution.  
331 *Nat Commun* 4:1879.
- 332 26. Beaulieu JM, O’Meara BC (2016) Detecting hidden diversification shifts in  
333 models of trait-dependent speciation and extinction. *Syst Biol*:syw022–.
- 334 27. Lovette IJ, Bermingham E, Ricklefs RE (2002) Clade-specific morphological  
335 diversification and adaptive radiation in Hawaiian songbirds. *Proc Biol Sci*  
336 269(1486):37–42.
- 337 28. Eldredge N, Gould SJ (1972) Punctuated equilibria: an alternative to phyletic  
338 gradualism. *Models in Paleobiology*, ed Schopf T (Freeman Cooper, San  
339 Francisco), pp 82–115.
- 340 29. Donoghue MJ, Sanderson MJ (2015) Confluence, synnovation, and  
341 depauperons in plant diversification. *New Phytol* 207(2):260–274.
- 342 30. Cayuela L, Granzow-de la Cerda Í, Albuquerque FS, Golicher DJ (2012)  
343 taxonstand: An R package for species names standardisation in vegetation  
344 databases. *Methods Ecol Evol* 3(6):1078–1083.
- 345 31. Pennell MW, FitzJohn RG, Cornwell WK (2015) A simple approach for  
346 maximizing the overlap of phylogenetic and comparative data. *Methods Ecol*  
347 *Evol*:n/a–n/a.
- 348 32. Stevens P. (2012) Angiosperm Phylogeny website. *Angiosperm Phylogeny*  
349 *Website Version 12*. Available at:  
350 <http://www.mobot.org/MOBOT/research/APweb/>.
- 351 33. Qian H, Jin Y (2015) An updated megaphylogeny of plants, a tool for  
352 generating plant phylogenies and an analysis of phylogenetic community  
353 structure. *J Plant Ecol*:rtv047.
- 354 34. Schwery O, O’Meara BC (2015) MonoPhy: A simple R package to find and  
355 visualize monophyly issues. doi:10.7287/peerj.preprints.1600v1.
- 356 35. Rabosky DL, et al. (2014) BAMMtools: an R package for the analysis of  
357 evolutionary dynamics on phylogenetic trees. *Methods Ecol Evol* 5(7):701–  
358 707.
- 359 36. Bennett M, Leitch IJ (2012) Plant DNA C-values database (release 6.0, Dec  
360 2012). Available at: <http://www.kew.org/cvalues/>.
- 361
- 362
- 363

## 364 **Acknowledgments**

365 We thank D. A. Coomes, A. J. Helmstetter, T. Jucker and W. G. Lee for useful  
366 comments that helped improve the manuscript. J.I. and A.J.T. thank the Gatsby  
367 Charitable Foundation, Wellcome Trust and Newton Trust for funding. E.F.M was

368 funded by the BBSRC DTP at the University of Cambridge.

369

370 **Author contributions**

371 J.I and A.S.T.P conceived the study. J.I. and E.F.M. performed the analysis. J.I. and

372 A.J.T interpreted the analysis and wrote the manuscript. All authors edited the

373 manuscript.

374

375 **Figure Legends**

376

377 **Figure 1.** Seed mass and macroevolutionary rates across the angiosperm tree of life.

378 Phylogenetic tree of 4105 genera of plants with seed mass, rate of seed mass change,

379 and speciation ( $\lambda$ ), extinction ( $\mu$ ) and net diversification ( $r$ ) rates estimated by

380 BAMM. Seed mass and rate data were standardised to Z-scores so that variation could

381 be directly compared.

382

383 **Figure 2.** Correlation of seed mass and seed mass rate with macroevolutionary

384 dynamics. STRAPP correlations between speciation ( $\lambda$ ), extinction ( $\mu$ ), and net

385 diversification ( $r$ ) and each of a) seed mass and b) rate of seed mass change. Coloured

386 lines are Spearman correlations between  $\lambda$  (shown in red),  $\mu$  (blue),  $r$  (purple) and

387 each trait for one sample of the BAMM posterior distribution, bold line is the median.

388 The insets show the density plots of the absolute difference between the observed and

389 null correlation calculated across 5000 structured permutations of the evolutionary

390 rates on the phylogenetic tree (myr = million years).

391

392

393 **Supporting Information**

394

395 **Fig. S1.** Prior and posterior distribution of the number of rate shifts in BAMM for a)  
396 the speciation/extinction and b) phenotypic evolution analyses for  
397 *expectedNumberOfShifts* = 10, 25, 50 and 100. The analyses in the main text were  
398 carried out with *expectedNumberOfShifts* = 25 for both speciation/extinction and  
399 phenotypic evolution analyses.

400

401 **Fig. S2.** Phylogenetic tree of 4105 angiosperm genera with branches scaled by  
402 diversification rate as determined by BAMM. The colours of the branches indicate the  
403 rate of seed mass evolution, also estimated with BAMM.

404

405 **Fig. S3.** Mean genus seed mass and coefficient of variation for 2613 angiosperm  
406 genera. The two variables were not significantly correlated (PGLS test,  $F_{1,131} = 0.67$ ,  
407 p-value = 0.416).

408

409 **Fig. S4.** Correlation of coefficient of variation in seed mass with macroevolutionary  
410 dynamics. STRAPP correlations with speciation ( $\lambda$ ), extinction ( $\mu$ ) and net  
411 diversification ( $r$ ) and the genus-level coefficient of variation in seed mass for 2613  
412 angiosperm genera (i.e. each with seed mass data for >1 species in the Kew SID).  
413 Correlations and insets calculated as in Fig. 2.

414

415 **Fig. S5.** Proposed effects of seed mass and other life history traits on diversification  
416 (solid lines). Dashed lines indicate correlations between life history traits. Numbers  
417 indicate reference where the link is proposed.

418

419 **Fig. S6.** STRAPP correlations of diversification and phenotypic traits for 938  
420 angiosperm genera. The distribution of the absolute difference in the observed  
421 correlation minus the null correlation is plotted for each trait. The coloured dotted  
422 lines indicate the mean of that distribution, and the black dotted line indicates 0; a  
423 distribution with mean = 0 would show no association between a focal trait and  
424 speciation. STRAPP correlation of seed mass (shown in blue), C-value (shown in red)  
425 and life cycle (shown in green) with a) speciation rate ( $\lambda$ ), b) extinction rate ( $\mu$ ), and  
426 c) net diversification rate ( $r$ ).

427 **Fig. S7.** Phylogenetic tree of 303 angiosperm families with representatives in this  
428 study. The red bars indicate the levels of sampling for each family.

429

430 **Fig. S8.** Type I error analysis. We estimated the type I error rate of our analysis by  
431 simulating neutral traits on the angiosperm phylogenetic tree. We performed 1000  
432 simulations and then ran 1000 STRAPP tests with each simulated dataset. We  
433 estimated the corresponding p-values for the association between traits and  
434 diversification and calculated the type I error as the proportion of datasets where a  
435 significant association (p-value < 0.05) was detected.

436

437 **Fig. S9.** Mean genus seed mass of strict annual ( $n = 106$ ) and perennial ( $n = 832$ )  
438 genera. No significant difference between the means of the two groups was found  
439 when phylogeny was accounted for (PGLS,  $F_{1,937} < 0.01$ , p-value = 0.972).

440

441

442



443 **Supplementary Information**

444

445 Seed mass is central to a network of inter-correlated life history traits that can impact  
446 diversification. Two such traits are genome size or plant C-value (measured as  
447 picograms of DNA per haploid nucleus) and life cycle. We compared the correlation  
448 between macroevolutionary parameters ( $\lambda$ ,  $\mu$ ,  $r$ ) and each of seed mass, C-value and  
449 life cycle across a dataset of 938 plant genera (106 strictly annuals and 832 strictly  
450 perennials). Genome content data and life cycle data were downloaded from the Plant  
451 DNA C-values database (36). Surprisingly, mean seed mass did not differ between  
452 strictly annual and perennial plants when accounting for phylogenetic relationships  
453 (Fig. S9, PGLS:  $F_{1,937} < 0.01$ , p-value = 0.972).

454

455 STRAPP requires large phylogenetic trees ( $n > 1000$  species) to detect correlations  
456 (17). In this reduced dataset, we ran STRAPP correlations for each focal trait with the  
457 diversification parameters calculated from our 4105 genera BAMM analysis. We then  
458 calculated the absolute differences in the observed and the null correlations between  
459 the macroevolutionary parameters and seed mass, C-value and “annuality” (a binary  
460 variable specifying whether the genus was annual or not). These differences were  
461 similar and positive for seed mass and life cycle, while smaller for C-value (Fig. S6).  
462 However, with this reduced dataset, only life-cycle showed significant correlations  
463 with macroevolutionary dynamics (Table S1). These correlations were weaker than  
464 those observed with seed mass in the main text (Fig. 2), and considerably weaker than  
465 correlations with the rate of seed size evolution.

466

467 **Table S1.** STRAPP correlations for 938 genera of angiosperms with seed mass,

468 genome size (i.e., C-value) and life cycle data. Macroevolutionary parameters were  
469 obtained from an analysis with 4105 genera (see Main text).

470

471

---

| parameter | Seed<br>mass<br><i>rho</i> | Seed<br>mass<br>p-value | Life<br>Cycle<br><i>rho</i> | Life<br>Cycle<br>p-value | C-<br>value<br><i>rho</i> | C-value<br>p-value |
|-----------|----------------------------|-------------------------|-----------------------------|--------------------------|---------------------------|--------------------|
| $\lambda$ | -0.166                     | 0.070                   | 0.171                       | 0.017                    | 0.042                     | 0.828              |
| $\mu$     | -0.162                     | 0.099                   | 0.147                       | 0.055                    | 0.109                     | 0.540              |
| r         | -0.141                     | 0.142                   | 0.168                       | 0.012                    | -0.090                    | 0.885              |

---

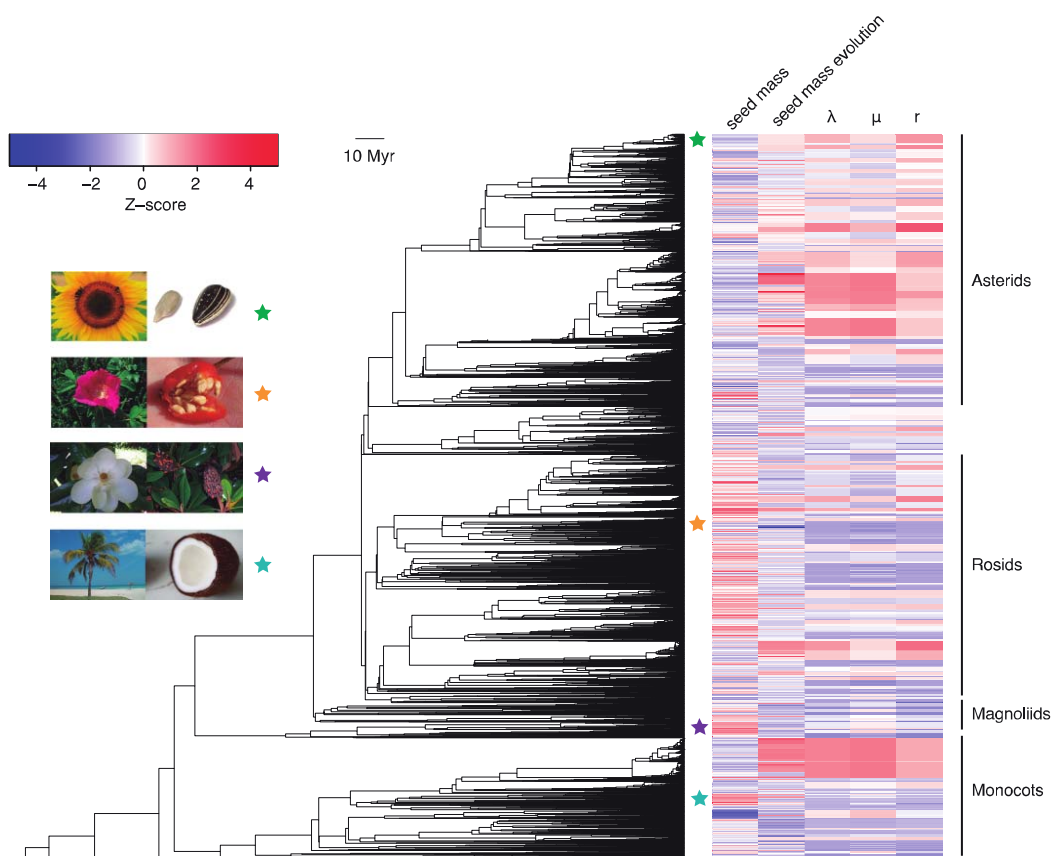

**Figure 1**

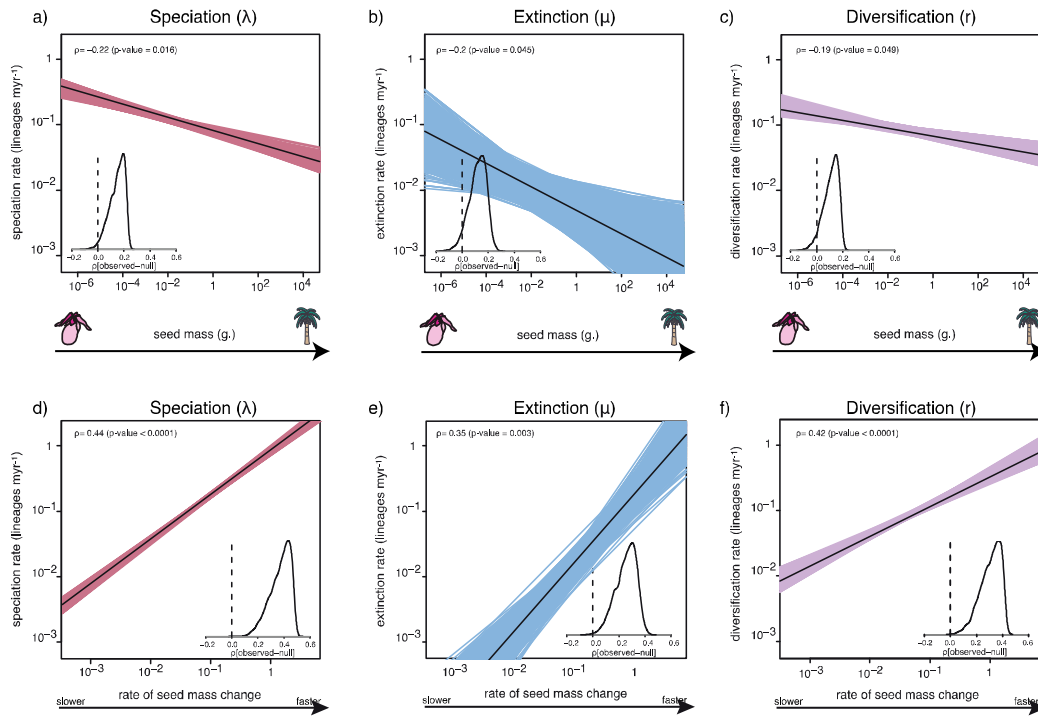

**Figure 2**
